# Supplementary material for: Lenalidomide combined with low-dose cyclophosphamide and prednisone modulates Ikaros and Aiolos in lymphocytes, resulting in immunostimulatory effects in lenalidomide-refractory multiple myeloma patients
Source: PubMed Central journal article supplement (PMC6188055; doi:10.18632/oncotarget.26131), 2018-09-21
Supplement: oncotarget-09-34009-s001.pdf [file oncotarget-09-34009-s001.pdf]

# Lenalidomide combined with low-dose cyclophosphamide and prednisone modulates Ikaros and Aiolos in lymphocytes, resulting in immunostimulatory effects in lenalidomide-refractory multiple myeloma patients

## SUPPLEMENTARY MATERIALS

### A Activated T-cells

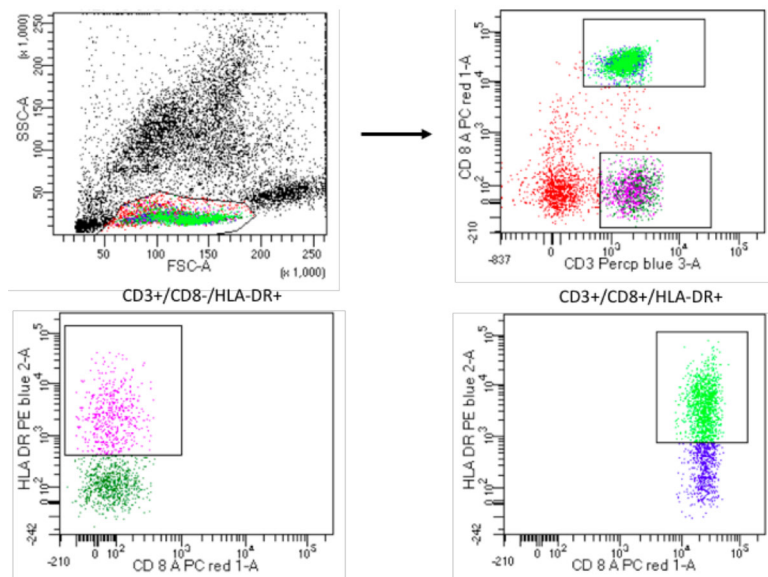

### B IFN $\gamma$ and IL-2 expression in T-cell subsets

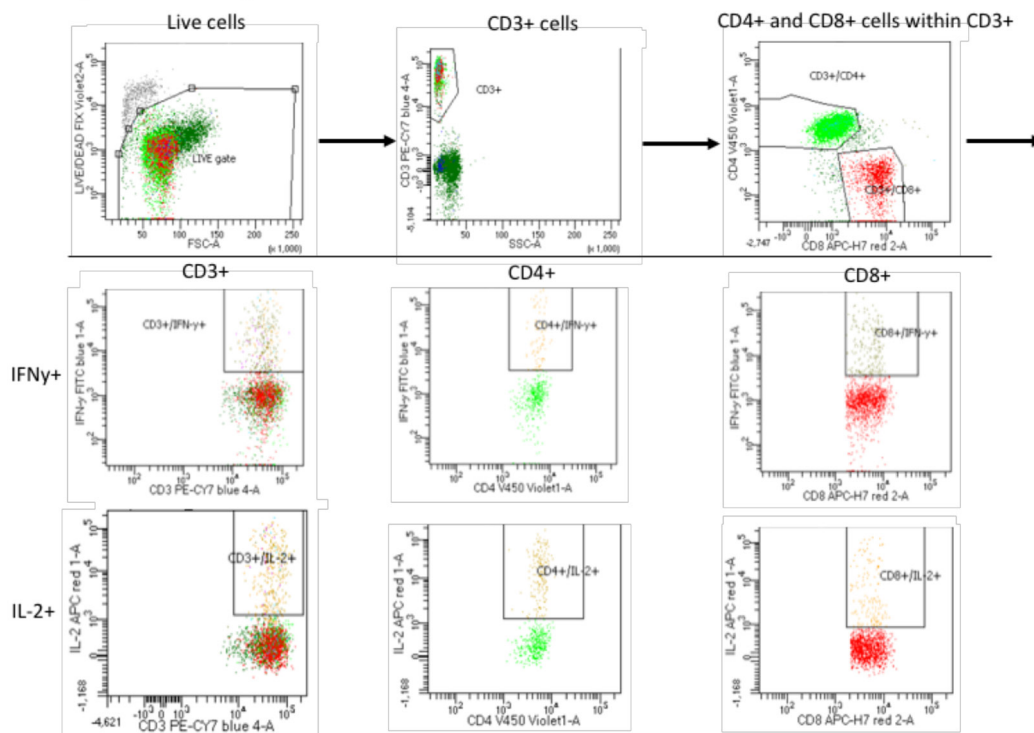

### C Regulatory T-cells

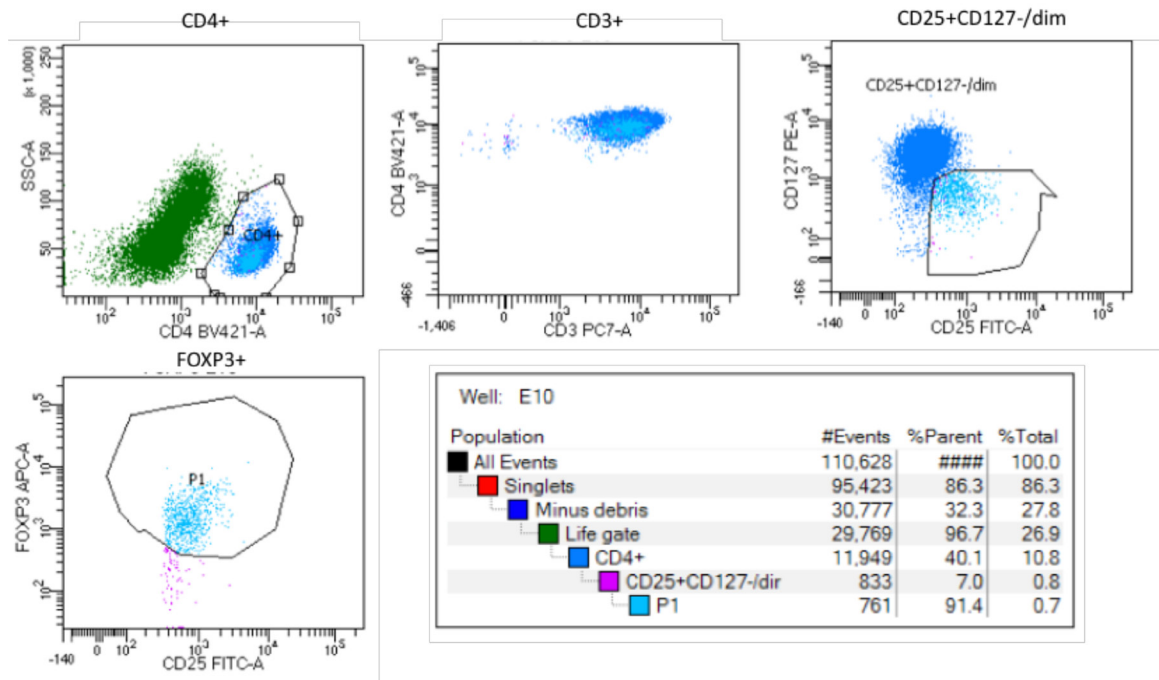

**Supplementary Figure 1: Representative flow cytometry plots showing the gating strategy to detect different lymphocyte subsets.** (A) Activated T-cells, defined as the percentage of T-cells expressing HLA-DR. CD3+/CD8- cells were considered CD4+ T-cells. (B) IFN $\gamma$  and IL-2 positive T-cells. Cytokine production (IL-2 and IFN $\gamma$ ) of T-cells was measured after stimulating PBMCs with CD3/CD28 Human T-activator Beads (Dynabeads<sup>®</sup>) in a 1:1 ratio for 5 hours at 37 $^{\circ}$  C in the presence of an inhibitor of intracellular protein transport (Brefeldin A, eBioscience). (C) Regulatory T-cells were defined as CD3+/CD4+/CD25+/CD127-/dim. FOXP3 intracellular staining was used to confirm the FOXP3 positivity of our defined regulatory T-cells. The FOXP3/Transcription Factor Staining Buffer Set (eBioscience) was used for the fixation and intracellular staining according to the manufacturer's protocol. The LIVE/DEAD<sup>®</sup> Fixable Dead Cell Staining kit (Thermofisher Scientific) was used to determine the viability of the cells prior to the fixation and permeabilization and subsequent intracellular staining.

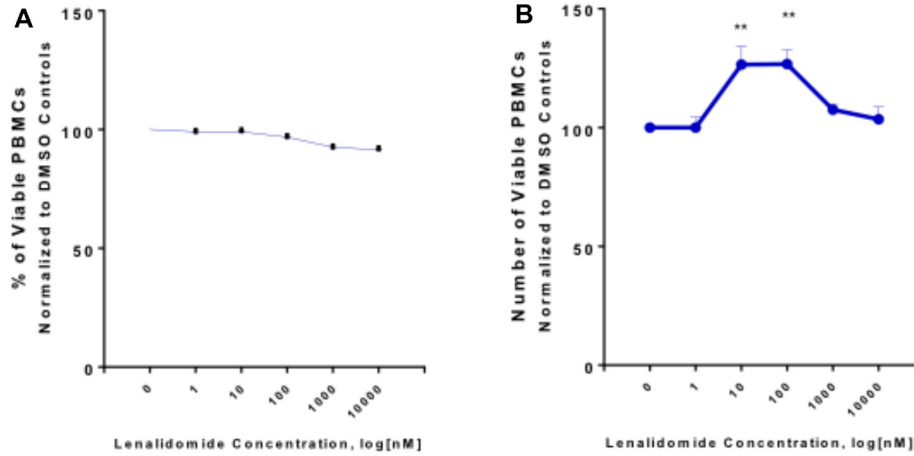

**Supplementary Figure 2: Effect of lenalidomide on viability of PBMCs.** Following DMSO or lenalidomide treatment and anti-CD3 stimulation for 72 hours, and prior to co-culture, viability of PBMCs was determined by flow cytometry. After 2 washes with PBS, these PBMCs were stained with Annexin-V (BD Biosciences) and To-Pro3 (Invitrogen) according to manufacturer's protocol, and CountBright™ Absolute Counting Beads (ThermoFisher) were added for absolute cell count. Live PBMCs were gated as Annexin-V and Topro- population, and enumerated by the counting beads according to manufacturer's protocol. (A) Percent viable PBMCs of total PBMCs was plotted ( $n = 4$ ). (B) Viable PBMCs were enumerated with Countbright™ absolute counting beads according to manufacturer's protocol ( $n = 4$ ).  $P$ -values were calculated using one-way ANOVA, \*\* $P < 0.01$ .
